# Supplementary material for: Development of a new biodetection system independent of known marker molecules using a novel material for microarrays made from amorphous carbon substrates
Source: Royal Society of Chemistry journal article supplement (doi:10.1039/d5ay00426h), 2025-01-01
Supplement: d5ay00426h1.pdf [file d5ay00426h1.pdf]

**Fig. S1.** Spraying conditions

| Trypsin spray |                                                      | Matrix spraying |                                              |
|---------------|------------------------------------------------------|-----------------|----------------------------------------------|
| Flow rate     | 0.075 mL/min,<br>using a syringe pump                | Flow rate       | 0.2 mL/min                                   |
| Trypsin       | 0.05 mg/mL in 50 mM NH <sub>4</sub> HCO <sub>3</sub> | Matrix          | CHCA 5 mg/mL in 0.1% TFA/90%<br>acetonitrile |
| Pattern       | HH                                                   | Pattern         | CC                                           |
| Passes        | 12                                                   | Passes          | 8                                            |
| Temperature   | 30 °C                                                | Temperture      | 75 °C                                        |
