# Supplementary material for: Development of a new biodetection system independent of known marker molecules using a novel material for microarrays made from amorphous carbon substrates
Source: Royal Society of Chemistry journal article supplement (doi:10.1039/d5ay00426h), 2025-01-01
Supplement: d5ay00426h2.pdf [file d5ay00426h2.pdf]

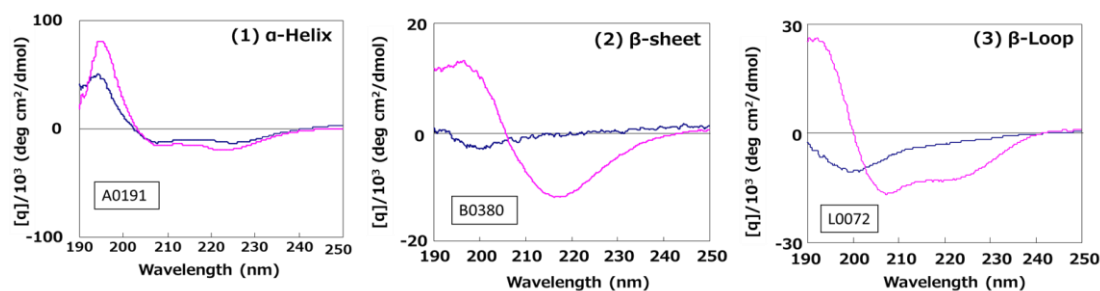

**Fig. S2**

Representative circular dichroism (CD) -spectra of arrayed capture peptides: (1)  $\alpha$ -helix; (2)  $\beta$ -sheet; (3)  $\beta$ -loop. CD measurements were performed in 20% trifluoroethanol, 20 mM Tris-HCl containing 0.5 mM  $\text{CaCl}_2$  (pH 7.4). CD spectroscopy was performed on a Jasco J-720WI spectropolarimeter (JASCO Corp., Tokyo, Japan) with a thermoregulator using a quartz cell with 1 mm pathlength at 25 °C.
