# Supplementary material for: Development of a new biodetection system independent of known marker molecules using a novel material for microarrays made from amorphous carbon substrates
Source: Royal Society of Chemistry journal article supplement (doi:10.1039/d5ay00426h), 2025-01-01
Supplement: d5ay00426h3.pdf [file d5ay00426h3.pdf]

A

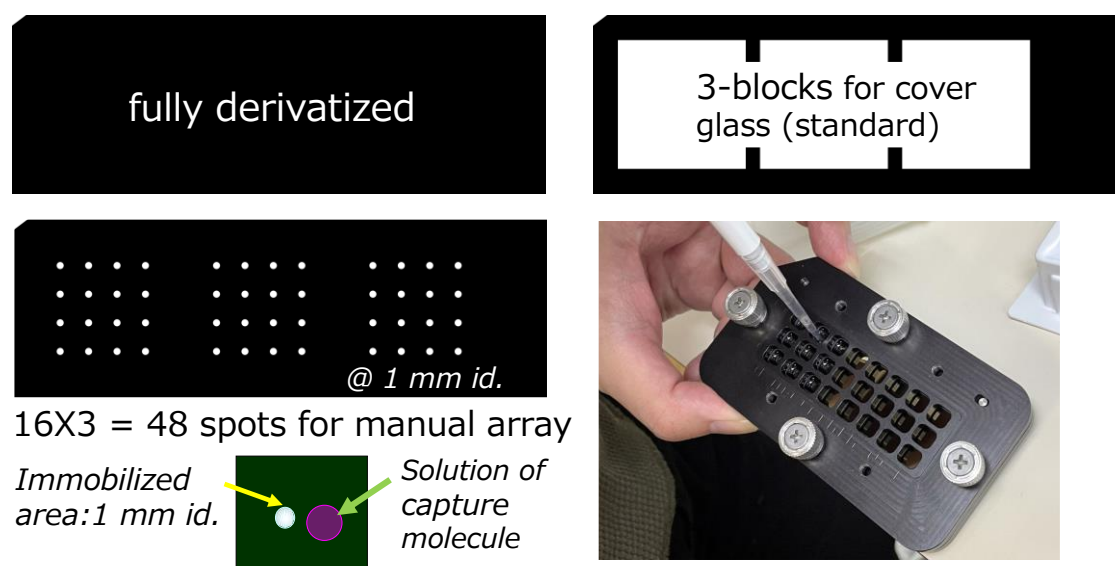

B

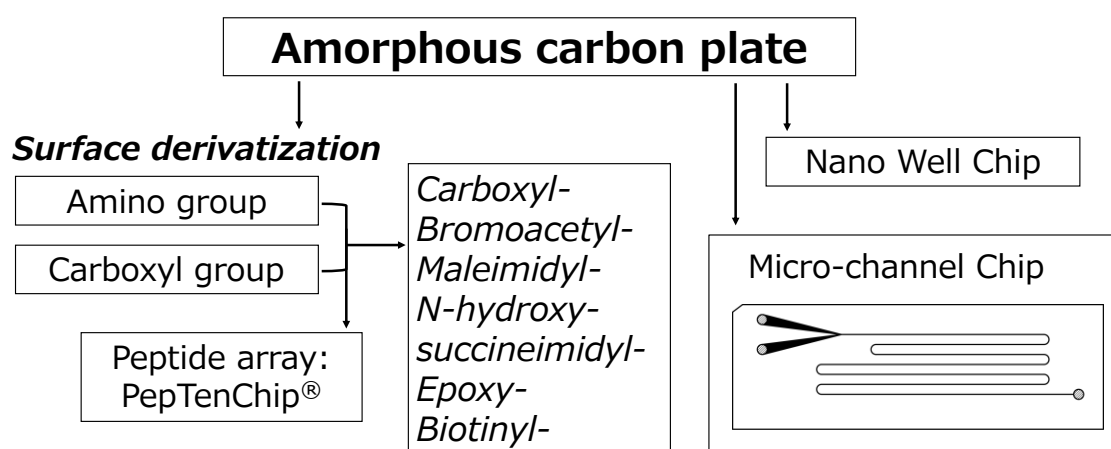

**Fig. S3.**

**A.** Different derivatizing patterns (fully and/or partially derivatized) by surface-masking. Naked surface depicted black area is non-self-fluorescent and chemically inert. Picture right is manual operation with a fully derivatized substrate using incubation chamber. **B.** Overview of applications for amorphous carbon substrates. Moreover nano-wells and/or tailor-made micro-channels can also be easily manufactured.
