# Supplementary material for: Development of a new biodetection system independent of known marker molecules using a novel material for microarrays made from amorphous carbon substrates
Source: Royal Society of Chemistry journal article supplement (doi:10.1039/d5ay00426h), 2025-01-01
Supplement: d5ay00426h4.pdf [file d5ay00426h4.pdf]

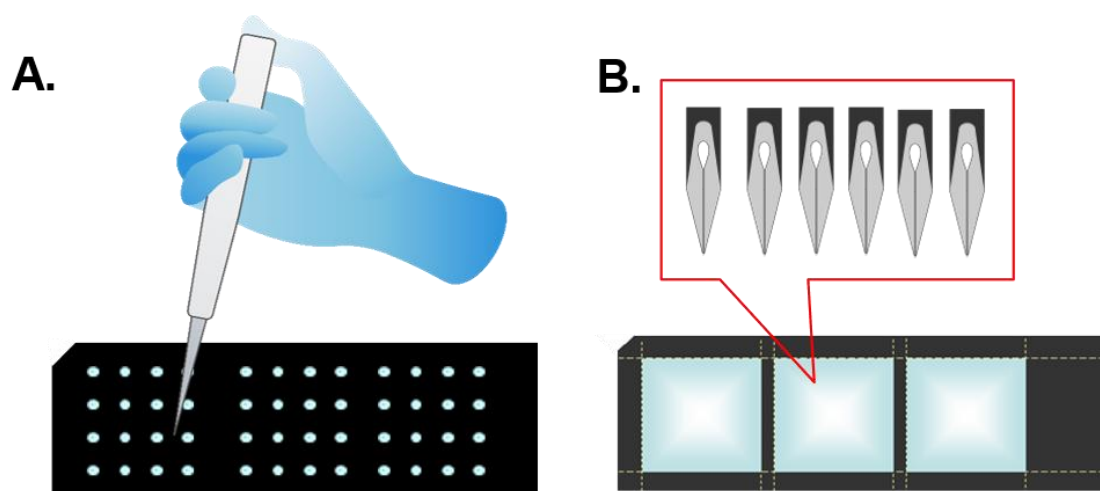

**Fig. S4.**

Two arraying methods are shown. (a): Manual arraying with 48 spot-derivatized substrate and micropipette. (b): Three block derivatized substrate and microarrayer, NanoPrint<sup>TM</sup> with Stealth Pins (P/N SMP4B, Arrayit Corp.). Spot diameter was 100 - 200  $\mu\text{m}$ , dispensing volume was *ca.* 500 pico Liter and density and array density was 1,254 spots/ $\text{cm}^2$ .
