# Supplementary material for: Development of a new biodetection system independent of known marker molecules using a novel material for microarrays made from amorphous carbon substrates
Source: Royal Society of Chemistry journal article supplement (doi:10.1039/d5ay00426h), 2025-01-01
Supplement: d5ay00426h5.pdf [file d5ay00426h5.pdf]

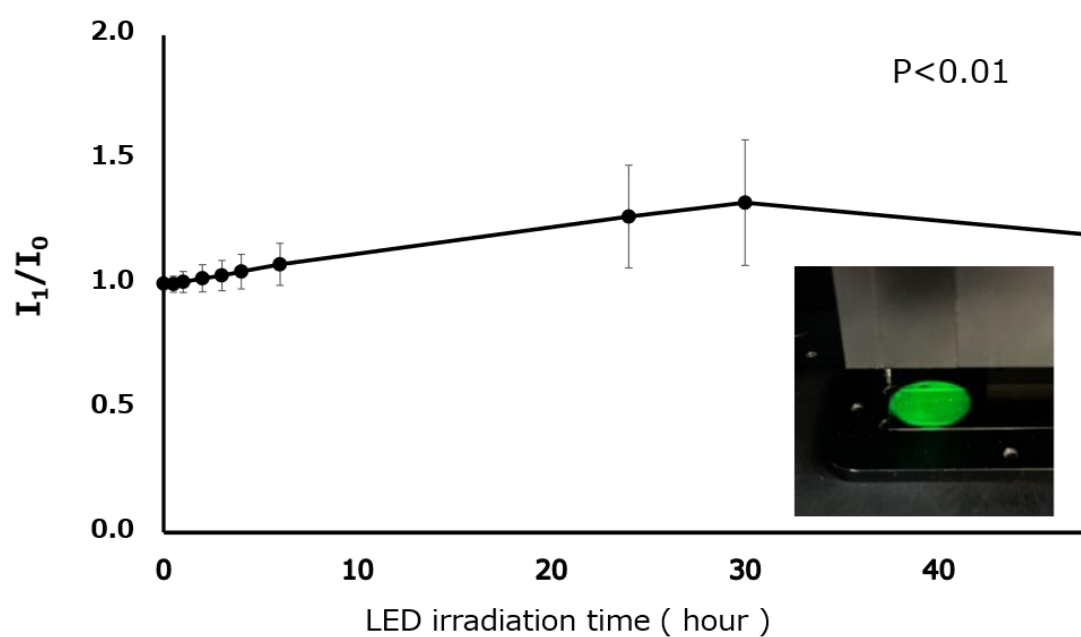

**Fig. S5.**

Changes in fluorescent intensities over time. Irradiate the entire block of peptide microarray with LED light. (Ex.  $531 \pm 20$  nm, Em.  $593 \pm 20$  nm). [inset]
