# Supplementary material for: Development of a new biodetection system independent of known marker molecules using a novel material for microarrays made from amorphous carbon substrates
Source: Royal Society of Chemistry journal article supplement (doi:10.1039/d5ay00426h), 2025-01-01
Supplement: d5ay00426h7.pdf [file d5ay00426h7.pdf]

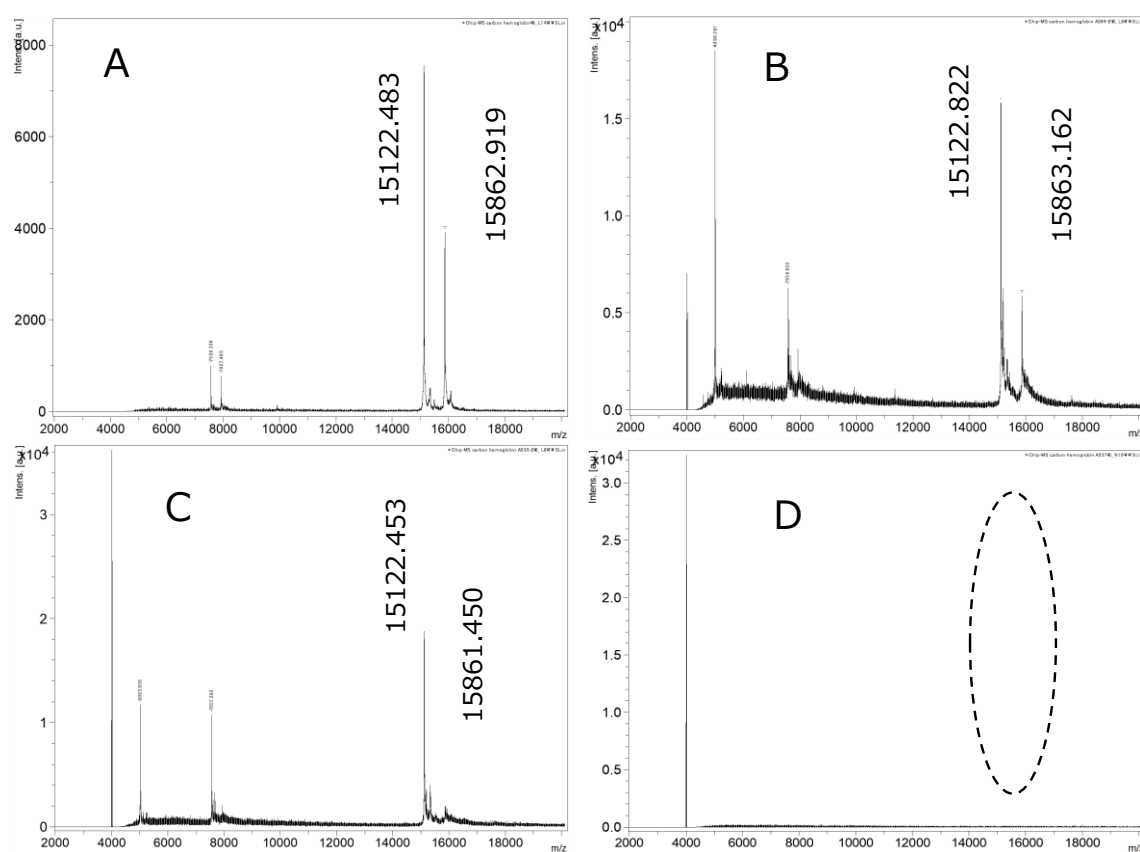

**Fig. S7.**

Resulting mass-spectra, A: hemoglobin as a positive control, hemoglobin: sinapinic acid = 1:1; B: arrayed peptide A0394; C: arrayed peptide A0535; D: arrayed peptide A0537 (not captured hemoglobin).
