# Supplementary figures and images for: Development of a new biodetection system independent of known marker molecules using a novel material for microarrays made from amorphous carbon substrates
Source: Royal Society of Chemistry journal article supplement (doi:10.1039/d5ay00426h), 2025-01-01

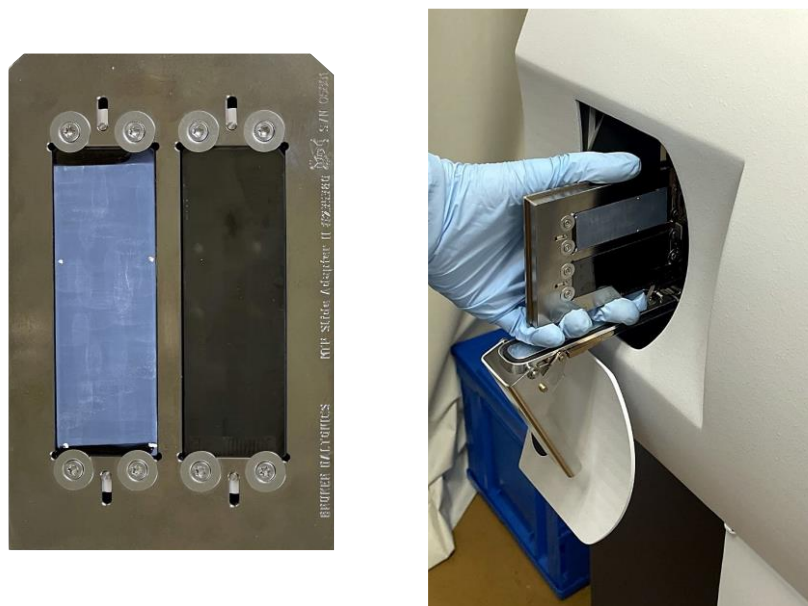

**Fig. S6.**

The present chip inserted in to MALDI-TOFMS mounted on an adapter (P/N 8235380, Bruker Japan K.K.).

Supplement: d5ay00426h6.pdf [file d5ay00426h6.pdf]
